# Supplementary material for: Changes in thyroid peroxidase activity in response to various chemicals
Source: Royal Society of Chemistry journal article supplement (doi:10.1039/c2em30106g), 2012-01-01
Supplement: c2em30106g.pdf [file c2em30106g.pdf]

File Name : Chemical structure\_supl.tif

Caption : Chemical structures used in TPO guaiacol assay.

File Name : Supplementary Figure\_V2.TIF

Caption : Effects of (a) benzophenones (BPs), (b) polycyclic aromatic hydrocarbons (PAHs), (c) persistent organic pollutants (POPs), (d) other compounds on human TPO activity. The error bars indicated the standard deviation on the mean values.
